# Supplementary material for: A pan-cancer analysis of tumor-infiltrating B cell repertoires
Source: Research Square preprint supplement (doi:10.21203/rs.3.rs-841879/v1), 2021-09-09
Supplement: Supplementary file 2 [file 8c701ada21f3d65936bb6522.xlsx]

## Sheet: Sheet1
Supplementary Table 1
Tumor	Primary Tumor	Metastatic Tumors	Normal Solid	Total reads sequenced per sample	Ig Reads	Ig clones
				Median (min-max)	Median (min-max)	Median (min-max)
ACC	68	0	0	62615525 (26994182-93796872)	11 (0-9315)	8 (0-1025)
BLCA	407	0	19	59954267 (24027361-149204452)	1725 (0-288348)	319.5 (0-5261)
BRCA	1094	0	113	74886056 (24300451-187467995)	4908 (1-375918)	735 (1-15259)
CESC	303	0	3	66304315 (23950932-134684782)	4964.5 (9-230219)	657 (8-9865)
CHOL	35	0	9	55903461 (34208102-80520806)	636 (3-107785)	281 (2-11086)
COAD	456	0	41	51458173 (5271052-105993154)	4891 (8-120525)	795 (8-15477)
GBM	154	0	4	64703272.5 (44781738-120534895)	59.5 (1-19445)	41 (1-4285)
HNSC	520	0	44	69392642 (26296551-116430322)	4979 (3-327687)	647 (3-12053)
KICH	64	0	24	83461233 (46035744-106405236)	86 (0-48683)	50 (0-10999)
KIRC	532	0	72	78820886 (28668344-183724655)	1301 (1-430697)	360.5 (1-13868)
KIRP	288	0	32	67009890 (20901900-124057557)	186 (0-177328)	103 (0-20524)
LGG	438	0	0	72715489.5 (33127787-123178193)	4 (0-11434)	4 (0-1845)
LIHC	371	0	50	62932505 (25893240-153281376)	270 (0-85163)	104 (0-3682)
LUAD	515	0	59	57627892 (24146547-136132651)	17614 (15-315639)	1555 (12-16139)
LUSC	499	0	51	70169407.5 (21586543-199864020)	24190.5 (6-396978)	1976.5 (5-20364)
MESO	87	0	0	66384473 (33578727-90149604)	1728 (1-141587)	379 (1-8101)
PAAD	176	0	4	61316968.5 (23986132-108982216)	4413.5 (1-145633)	827 (1-7829)
PCPG	175	0	3	63274692.5 (37828408-118310186)	99 (1-47885)	64 (1-5045)
PRAD	497	0	52	67457442 (26403224-136690954)	394 (1-178640)	161 (1-10817)
READ	166	0	10	52522554 (19755698-117000539)	3741 (37-152400)	752 (21-10615)
SARC	258	0	2	63648060.5 (27256451-119791812)	130 (0-203957)	49.5 (0-11146)
SKCM	103	365	1	71509610 (8861327-134998914)	3849 (0-346317)	385 (0-12236)
TGCT	150	0	0	58327829.5 (27368204-107291085)	13119 (4-233460)	676 (3-5501)
THCA	337	0	38	79288399 (28396686-155154872)	722 (0-276438)	226.5 (0-17713)
THYM	120	0	2	63706807.5 (35195055-102344058)	1395 (0-301724)	327.5 (0-9985)
UCEC	545	0	35	34218459 (10058251-87154384)	1070.5 (1-261103)	278 (1-10145)
UCS	56	0	0	64390139.5 (43664951-75567157)	249 (2-123177)	63 (2-1789)
UVM	75	0	0	62680969 (31213794-89708332)	8 (0-157162)	7 (0-1061)

## Sheet: Sheet2
Supplementary Table 2
Cancer type	Feature	Hazard Ratio	P-value	Lower 95	Upper 95	tumor_type	FDR
BLCA	entropy_IGH	0.994198	0.861107	0.93146	1.06116	BLCA	0.861107
BLCA	entropy_IGK	1.04277	0.423151	0.941197	1.15531	BLCA	0.574665
BLCA	entropy_IGL	1.01619	0.743227	0.923083	1.11869	BLCA	0.810793
BLCA	evenness_IGH	2.06956	0.274485	0.561485	7.62816	BLCA	0.486666
BLCA	evenness_IGK	2.82952	0.0504081	0.998152	8.02101	BLCA	0.302448
BLCA	evenness_IGL	1.85392	0.245107	0.654667	5.25004	BLCA	0.486666
BLCA	gini_cluster_IGH	0.220722	0.0494379	0.0488996	0.996291	BLCA	0.302448
BLCA	gini_cluster_IGK	0.610172	0.183526	0.29463	1.26365	BLCA	0.486666
BLCA	gini_cluster_IGL	0.506851	0.0806176	0.236487	1.08631	BLCA	0.32247
BLCA	gini_vertex_IGH	0.806124	0.507384	0.426257	1.52452	BLCA	0.608861
BLCA	gini_vertex_IGK	0.71869	0.283889	0.39279	1.31499	BLCA	0.486666
BLCA	gini_vertex_IGL	0.782997	0.430999	0.425932	1.4394	BLCA	0.574665
BRCA	entropy_IGH	0.900322	0.00795801	0.833142	0.972919	BRCA	0.0477481
BRCA	entropy_IGK	0.878468	0.0277511	0.782726	0.985921	BRCA	0.0970023
BRCA	entropy_IGL	0.82267	0.000246922	0.741131	0.913179	BRCA	0.00296306
BRCA	evenness_IGH	0.329128	0.0740469	0.0972335	1.11408	BRCA	0.177713
BRCA	evenness_IGK	1.0174	0.975713	0.335125	3.0887	BRCA	0.975713
BRCA	evenness_IGL	0.516395	0.2197	0.179735	1.48365	BRCA	0.376628
BRCA	gini_cluster_IGH	0.798607	0.718576	0.235037	2.7135	BRCA	0.800683
BRCA	gini_cluster_IGK	0.388487	0.0323341	0.163434	0.923442	BRCA	0.0970023
BRCA	gini_cluster_IGL	0.491553	0.111573	0.204952	1.17893	BRCA	0.223146
BRCA	gini_vertex_IGH	1.359	0.365562	0.699273	2.64115	BRCA	0.548343
BRCA	gini_vertex_IGK	1.19734	0.622662	0.58436	2.45331	BRCA	0.800683
BRCA	gini_vertex_IGL	1.13156	0.73396	0.554777	2.30802	BRCA	0.800683
CESC	entropy_IGH	0.913584	0.0843644	0.824468	1.01233	CESC	0.202474
CESC	entropy_IGK	0.838094	0.0431095	0.706257	0.994541	CESC	0.129328
CESC	entropy_IGL	0.818117	0.0159765	0.694857	0.963242	CESC	0.0639061
CESC	evenness_IGH	0.577863	0.67115	0.0459545	7.26644	CESC	0.91948
CESC	evenness_IGK	1.23019	0.842857	0.158651	9.53896	CESC	0.91948
CESC	evenness_IGL	1.28242	0.810298	0.168247	9.77497	CESC	0.91948
CESC	gini_cluster_IGH	0.145476	0.110629	0.0136225	1.55356	CESC	0.221258
CESC	gini_cluster_IGK	0.204587	0.00770667	0.0636798	0.657287	CESC	0.04624
CESC	gini_cluster_IGL	0.190839	0.00540542	0.0594091	0.613028	CESC	0.04624
CESC	gini_vertex_IGH	1.00412	0.994809	0.290976	3.46508	CESC	0.994809
CESC	gini_vertex_IGK	0.789937	0.702985	0.235064	2.65459	CESC	0.91948
CESC	gini_vertex_IGL	0.651787	0.470866	0.20362	2.08637	CESC	0.807199
COAD	entropy_IGH	1.01658	0.721159	0.928813	1.11264	COAD	0.86697
COAD	entropy_IGK	1.01695	0.852894	0.85141	1.21468	COAD	0.86697
COAD	entropy_IGL	0.988137	0.86697	0.859355	1.13622	COAD	0.86697
COAD	evenness_IGH	0.351633	0.264054	0.056173	2.20116	COAD	0.607507
COAD	evenness_IGK	0.401877	0.303753	0.070725	2.28357	COAD	0.607507
COAD	evenness_IGL	0.186675	0.0580763	0.0329027	1.05911	COAD	0.348022
COAD	gini_cluster_IGH	0.799081	0.825778	0.108456	5.88746	COAD	0.86697
COAD	gini_cluster_IGK	0.89822	0.838162	0.320655	2.5161	COAD	0.86697
COAD	gini_cluster_IGL	1.20733	0.729941	0.414233	3.5189	COAD	0.86697
COAD	gini_vertex_IGH	2.7054	0.046098	1.01738	7.19415	COAD	0.348022
COAD	gini_vertex_IGK	2.3118	0.111471	0.823703	6.48827	COAD	0.348022
COAD	gini_vertex_IGL	2.21945	0.116007	0.82126	5.99803	COAD	0.348022
GBM	entropy_IGH	1.12926	0.00474889	1.03788	1.22868	GBM	0.0485628
GBM	entropy_IGK	1.13687	0.0390533	1.00646	1.28417	GBM	0.0850273
GBM	entropy_IGL	1.07271	0.192292	0.965295	1.19208	GBM	0.209773
GBM	evenness_IGH	0.58687	0.615642	0.0732692	4.7007	GBM	0.615642
GBM	evenness_IGK	0.316953	0.15452	0.0651707	1.54148	GBM	0.185424
GBM	evenness_IGL	0.166487	0.0441561	0.0290487	0.954189	GBM	0.0850273
GBM	gini_cluster_IGH	6.90748	0.0495993	1.00339	47.5521	GBM	0.0850273
GBM	gini_cluster_IGK	2.7414	0.0666454	0.933112	8.05402	GBM	0.0999681
GBM	gini_cluster_IGL	4.30141	0.0226693	1.22656	15.0845	GBM	0.0850273
GBM	gini_vertex_IGH	2.48366	0.109242	0.81583	7.5611	GBM	0.145656
GBM	gini_vertex_IGK	2.45033	0.0474388	1.01018	5.94362	GBM	0.0850273
GBM	gini_vertex_IGL	3.93348	0.00809379	1.42746	10.839	GBM	0.0485628
HNSC	entropy_IGH	0.895118	0.000169142	0.844899	0.948322	HNSC	0.000986554
HNSC	entropy_IGK	0.849476	0.00151335	0.768025	0.939565	HNSC	0.00363203
HNSC	entropy_IGL	0.871498	0.00117723	0.802012	0.947006	HNSC	0.0035317
HNSC	evenness_IGH	2.80747	0.143739	0.703568	11.2027	HNSC	0.150175
HNSC	evenness_IGK	3.71229	0.0374396	1.07923	12.7694	HNSC	0.0561594
HNSC	evenness_IGL	2.15784	0.150175	0.756914	6.15168	HNSC	0.150175
HNSC	gini_cluster_IGH	0.344329	0.106248	0.0944376	1.25546	HNSC	0.127497
HNSC	gini_cluster_IGK	0.242633	3.00626e-05	0.12476	0.471874	HNSC	0.000360751
HNSC	gini_cluster_IGL	0.279829	0.000246638	0.141632	0.552871	HNSC	0.000986554
HNSC	gini_vertex_IGH	0.477425	0.0305504	0.244306	0.932987	HNSC	0.052372
HNSC	gini_vertex_IGK	0.432007	0.0158784	0.218403	0.854523	HNSC	0.0317569
HNSC	gini_vertex_IGL	0.540801	0.0501726	0.29233	1.00046	HNSC	0.0668968
KIRC	entropy_IGH	0.982055	0.64472	0.909303	1.06063	KIRC	0.761965
KIRC	entropy_IGK	0.91836	0.152593	0.817211	1.03203	KIRC	0.243659
KIRC	entropy_IGL	0.928508	0.182744	0.832524	1.03556	KIRC	0.243659
KIRC	evenness_IGH	0.3082	0.034649	0.10341	0.918554	KIRC	0.103947
KIRC	evenness_IGK	0.513789	0.180445	0.193895	1.36145	KIRC	0.243659
KIRC	evenness_IGL	0.418319	0.0525631	0.173309	1.0097	KIRC	0.126151
KIRC	gini_cluster_IGH	2.44667	0.178026	0.66545	8.99572	KIRC	0.243659
KIRC	gini_cluster_IGK	1.12609	0.790655	0.468589	2.70617	KIRC	0.790655
KIRC	gini_cluster_IGL	1.19373	0.698468	0.487311	2.92419	KIRC	0.761965
KIRC	gini_vertex_IGH	2.06741	0.0254371	1.0934	3.90909	KIRC	0.101748
KIRC	gini_vertex_IGK	2.25615	0.0185094	1.14633	4.44044	KIRC	0.101748
KIRC	gini_vertex_IGL	2.23592	0.0180197	1.14782	4.3555	KIRC	0.101748
KIRP	entropy_IGH	1.1343	0.0465179	1.00195	1.28415	KIRP	0.239621
KIRP	entropy_IGK	1.03866	0.703368	0.854429	1.26262	KIRP	0.703368
KIRP	entropy_IGL	1.06284	0.499823	0.890409	1.26866	KIRP	0.545261
KIRP	evenness_IGH	0.284919	0.221395	0.0380838	2.13158	KIRP	0.499141
KIRP	evenness_IGK	0.467439	0.470193	0.0593411	3.68209	KIRP	0.545261
KIRP	evenness_IGL	0.555126	0.491857	0.103642	2.97335	KIRP	0.545261
KIRP	gini_cluster_IGH	9.79106	0.0599054	0.90923	105.435	KIRP	0.239621
KIRP	gini_cluster_IGK	2.16989	0.291166	0.514926	9.14388	KIRP	0.499141
KIRP	gini_cluster_IGL	2.93432	0.133133	0.720111	11.9568	KIRP	0.399398
KIRP	gini_vertex_IGH	3.63901	0.0337193	1.10454	11.989	KIRP	0.239621
KIRP	gini_vertex_IGK	1.82183	0.335207	0.537869	6.17079	KIRP	0.502811
KIRP	gini_vertex_IGL	1.8528	0.290629	0.59031	5.81538	KIRP	0.499141
LGG	entropy_IGH	1.13717	0.0793277	0.985067	1.31277	LGG	0.440409
LGG	entropy_IGK	1.0702	0.303305	0.940509	1.21777	LGG	0.692744
LGG	entropy_IGL	1.11941	0.0801204	0.986556	1.27015	LGG	0.440409
LGG	evenness_IGH	13.1426	0.146803	0.405058	426.426	LGG	0.440409
LGG	evenness_IGK	1.78149	0.464585	0.379029	8.37327	LGG	0.696877
LGG	evenness_IGL	1.23398	0.824773	0.191876	7.93596	LGG	0.9429
LGG	gini_cluster_IGH	0.247646	0.379951	0.0109814	5.58476	LGG	0.692744
LGG	gini_cluster_IGK	1.00706	0.992692	0.223698	4.53362	LGG	0.992692
LGG	gini_cluster_IGL	4.05661	0.116635	0.705478	23.3262	LGG	0.440409
LGG	gini_vertex_IGH	0.550229	0.404101	0.135218	2.23899	LGG	0.692744
LGG	gini_vertex_IGK	0.921397	0.864325	0.360279	2.35643	LGG	0.9429
LGG	gini_vertex_IGL	1.14321	0.799665	0.406635	3.21403	LGG	0.9429
LIHC	entropy_IGH	0.932237	0.136311	0.850026	1.0224	LIHC	0.716844
LIHC	entropy_IGK	0.970299	0.600453	0.866772	1.08619	LIHC	0.734058
LIHC	entropy_IGL	0.982682	0.736774	0.887512	1.08806	LIHC	0.736774
LIHC	evenness_IGH	1.54613	0.658079	0.224463	10.65	LIHC	0.734058
LIHC	evenness_IGK	1.32654	0.672886	0.35728	4.92529	LIHC	0.734058
LIHC	evenness_IGL	1.37647	0.624276	0.383246	4.94378	LIHC	0.734058
LIHC	gini_cluster_IGH	0.245485	0.138979	0.0381959	1.57773	LIHC	0.716844
LIHC	gini_cluster_IGK	0.785079	0.596935	0.320205	1.92486	LIHC	0.734058
LIHC	gini_cluster_IGL	0.696237	0.44917	0.272601	1.77822	LIHC	0.734058
LIHC	gini_vertex_IGH	0.572453	0.179211	0.253651	1.29194	LIHC	0.716844
LIHC	gini_vertex_IGK	0.771162	0.45522	0.389887	1.52529	LIHC	0.734058
LIHC	gini_vertex_IGL	0.765238	0.420194	0.399256	1.4667	LIHC	0.734058
LUAD	entropy_IGH	0.977122	0.627875	0.889831	1.07298	LUAD	0.722867
LUAD	entropy_IGK	1.0082	0.940755	0.812908	1.2504	LUAD	0.940755
LUAD	entropy_IGL	0.962798	0.662628	0.812024	1.14157	LUAD	0.722867
LUAD	evenness_IGH	5.2033	0.0788747	0.826747	32.748	LUAD	0.264044
LUAD	evenness_IGK	3.97373	0.126179	0.678083	23.287	LUAD	0.30283
LUAD	evenness_IGL	2.63055	0.256411	0.495038	13.9784	LUAD	0.341881
LUAD	gini_cluster_IGH	0.380332	0.207854	0.0844947	1.71197	LUAD	0.341881
LUAD	gini_cluster_IGK	0.345516	0.0828792	0.103958	1.14836	LUAD	0.264044
LUAD	gini_cluster_IGL	0.354461	0.0756582	0.112877	1.11309	LUAD	0.264044
LUAD	gini_vertex_IGH	0.452623	0.0880147	0.182061	1.12527	LUAD	0.264044
LUAD	gini_vertex_IGK	0.564661	0.232812	0.220827	1.44385	LUAD	0.341881
LUAD	gini_vertex_IGL	0.562521	0.243999	0.213696	1.48075	LUAD	0.341881
LUSC	entropy_IGH	1.01225	0.743594	0.941033	1.08886	LUSC	0.868023
LUSC	entropy_IGK	0.971481	0.736241	0.820952	1.14961	LUSC	0.868023
LUSC	entropy_IGL	0.920303	0.22889	0.803852	1.05362	LUSC	0.549336
LUSC	evenness_IGH	0.310954	0.135486	0.0670874	1.44129	LUSC	0.406458
LUSC	evenness_IGK	0.575438	0.496261	0.117121	2.82725	LUSC	0.868023
LUSC	evenness_IGL	0.170362	0.0154656	0.0406623	0.713764	LUSC	0.185587
LUSC	gini_cluster_IGH	1.17588	0.815794	0.300873	4.59558	LUSC	0.868023
LUSC	gini_cluster_IGK	1.08101	0.868023	0.431345	2.70915	LUSC	0.868023
LUSC	gini_cluster_IGL	1.15553	0.760843	0.455516	2.93131	LUSC	0.868023
LUSC	gini_vertex_IGH	2.02842	0.134197	0.803916	5.11807	LUSC	0.406458
LUSC	gini_vertex_IGK	1.29348	0.604349	0.488675	3.42373	LUSC	0.868023
LUSC	gini_vertex_IGL	2.98217	0.0454612	1.02231	8.69924	LUSC	0.272767
MESO	entropy_IGH	0.962466	0.442786	0.872886	1.06124	MESO	0.885572
MESO	entropy_IGK	0.89816	0.19517	0.763448	1.05664	MESO	0.585511
MESO	entropy_IGL	1.04937	0.562826	0.891328	1.23544	MESO	0.914336
MESO	evenness_IGH	1.32475	0.769848	0.201351	8.71592	MESO	0.914336
MESO	evenness_IGK	0.857213	0.867129	0.141005	5.21125	MESO	0.914336
MESO	evenness_IGL	6.5897	0.0602537	0.921903	47.1027	MESO	0.394708
MESO	gini_cluster_IGH	0.280233	0.346216	0.0198586	3.95448	MESO	0.830919
MESO	gini_cluster_IGK	0.429018	0.149718	0.135652	1.35683	MESO	0.585511
MESO	gini_cluster_IGL	0.324396	0.0657846	0.0977782	1.07624	MESO	0.394708
MESO	gini_vertex_IGH	0.921205	0.865867	0.355435	2.38755	MESO	0.914336
MESO	gini_vertex_IGK	0.944202	0.914336	0.331701	2.68772	MESO	0.914336
MESO	gini_vertex_IGL	0.815804	0.691312	0.298658	2.22842	MESO	0.914336
PAAD	entropy_IGH	1.0206	0.642919	0.936298	1.1125	PAAD	0.961836
PAAD	entropy_IGK	1.01846	0.845634	0.847161	1.2244	PAAD	0.961836
PAAD	entropy_IGL	1.0495	0.538393	0.899788	1.22412	PAAD	0.961836
PAAD	evenness_IGH	1.07129	0.949135	0.129132	8.88754	PAAD	0.961836
PAAD	evenness_IGK	0.79938	0.822894	0.11251	5.67957	PAAD	0.961836
PAAD	evenness_IGL	1.87747	0.549682	0.238387	14.7864	PAAD	0.961836
PAAD	gini_cluster_IGH	2.42142	0.376191	0.34153	17.1676	PAAD	0.961836
PAAD	gini_cluster_IGK	1.25497	0.706127	0.38543	4.08619	PAAD	0.961836
PAAD	gini_cluster_IGL	1.03082	0.961836	0.297246	3.57481	PAAD	0.961836
PAAD	gini_vertex_IGH	1.03341	0.953051	0.346001	3.08654	PAAD	0.961836
PAAD	gini_vertex_IGK	1.27931	0.679042	0.39834	4.10861	PAAD	0.961836
PAAD	gini_vertex_IGL	0.728922	0.585928	0.233678	2.27376	PAAD	0.961836
SARC	entropy_IGH	0.988723	0.831305	0.890755	1.09747	SARC	0.906878
SARC	entropy_IGK	0.855846	0.00696304	0.764355	0.958287	SARC	0.0139261
SARC	entropy_IGL	0.901701	0.0670605	0.807174	1.0073	SARC	0.0898298
SARC	evenness_IGH	13.8122	0.0458434	1.04967	181.75	SARC	0.0785887
SARC	evenness_IGK	11.4939	0.00389716	2.1896	60.3349	SARC	0.0116915
SARC	evenness_IGL	11.3918	0.00633864	1.98588	65.3482	SARC	0.0139261
SARC	gini_cluster_IGH	0.956779	0.969199	0.101585	9.01139	SARC	0.969199
SARC	gini_cluster_IGK	0.163202	0.00181966	0.0522247	0.510003	SARC	0.00727864
SARC	gini_cluster_IGL	0.316538	0.0673723	0.0922856	1.08572	SARC	0.0898298
SARC	gini_vertex_IGH	0.438765	0.122572	0.154205	1.24843	SARC	0.147086
SARC	gini_vertex_IGK	0.212129	0.000153046	0.0950599	0.473374	SARC	0.00183655
SARC	gini_vertex_IGL	0.259786	0.00117418	0.115095	0.586376	SARC	0.00704507
SKCM	entropy_IGH	0.935611	0.0597332	0.872982	1.00273	SKCM	0.0716798
SKCM	entropy_IGK	1.02029	0.712111	0.91703	1.13519	SKCM	0.756481
SKCM	entropy_IGL	0.984396	0.756481	0.89125	1.08728	SKCM	0.756481
SKCM	evenness_IGH	11.828	1.08802e-05	3.9343	35.5595	SKCM	2.61124e-05
SKCM	evenness_IGK	7.38682	2.07543e-05	2.94154	18.5498	SKCM	3.11314e-05
SKCM	evenness_IGL	6.09034	7.61497e-05	2.48839	14.9061	SKCM	0.000101533
SKCM	gini_cluster_IGH	0.0797384	1.16464e-06	0.0287653	0.221038	SKCM	6.03304e-06
SKCM	gini_cluster_IGK	0.243772	1.46972e-05	0.128738	0.461595	SKCM	2.93944e-05
SKCM	gini_cluster_IGL	0.221472	3.92407e-06	0.116762	0.420084	SKCM	1.17722e-05
SKCM	gini_vertex_IGH	0.272838	1.50826e-06	0.160714	0.463184	SKCM	6.03304e-06
SKCM	gini_vertex_IGK	0.311928	1.99597e-05	0.182628	0.532771	SKCM	3.11314e-05
SKCM	gini_vertex_IGL	0.2608	9.24875e-07	0.152464	0.446116	SKCM	6.03304e-06
UCEC	entropy_IGH	0.922566	0.0696106	0.845644	1.00649	UCEC	0.127736
UCEC	entropy_IGK	0.904876	0.151889	0.789241	1.03745	UCEC	0.182267
UCEC	entropy_IGL	0.94151	0.379794	0.823025	1.07705	UCEC	0.379794
UCEC	evenness_IGH	3.29889	0.213167	0.503797	21.6014	UCEC	0.232546
UCEC	evenness_IGK	3.46943	0.120606	0.721254	16.689	UCEC	0.160809
UCEC	evenness_IGL	8.25793	0.0104211	1.64182	41.5353	UCEC	0.0455354
UCEC	gini_cluster_IGH	0.168314	0.0703548	0.0244312	1.15956	UCEC	0.127736
UCEC	gini_cluster_IGK	0.291101	0.0151785	0.107502	0.788259	UCEC	0.0455354
UCEC	gini_cluster_IGL	0.225678	0.0056883	0.0785687	0.64823	UCEC	0.0455354
UCEC	gini_vertex_IGH	0.444449	0.0851571	0.176548	1.11887	UCEC	0.127736
UCEC	gini_vertex_IGK	0.476623	0.0837226	0.205808	1.10379	UCEC	0.127736
UCEC	gini_vertex_IGL	0.329767	0.0120202	0.138748	0.78377	UCEC	0.0455354
